# Supplementary material for: Metagenomic profiling of ticks: Identification of novel rickettsial genomes and detection of tick-borne canine parvovirus
Source: PLoS Negl Trop Dis. 2019 Jan 14;13(1):e0006805. doi: 10.1371/journal.pntd.0006805 (PMC6347332; doi:10.1371/journal.pntd.0006805)
Supplement: S1 Data — (ALN) [file pntd.0006805.s010.aln]

>Candidatus_R_barbariae Concatenation of 3 sequences
gagtttgttcctggctcagaacgaacgctatcggtatgcttaacacatgcaagtcgaacg
gactaattttgggggtttgctccaattagttagtggcagacgggtgagtaacacgtggga
atctacccattagtacggaataacttttagaaataaaagctaataccgtatattctctgc
ggaggaaagatttatcgctgatggatgagcccgcgtcagattaggtagttggtgaggtaa
tggctcaccaagccgacgatctgtagctggtctgagaggatgatcagccacactgggact
gagacacggcccagactcctacgggaggcagcagtggggaatattggacaatgggcgaaa
gcctgatccagcaataccgagtgagtgatgaaggccttagggttgtaaaactcttttagc
aaggaagataatgacgttattggggacctgctcacggcggggctaatgaagcggtaataa
atatgattaaagaaatcggtagttctgagtatatt-cctaaatatatagctaaagctaag
gataaaaatgatccatttagattaatgggttttggtcatcgtgtatataaaaact-----
-----------------atgacccgcgtgccgcagtacttaaagaaacgtgcaaagaagt
attaa-------------aggaactcgggcagctaga----caacaatccgttcttacaa
atagcaatagaacttgaagctatcgctcttaaagatgaatattttattgagagaaaatta
tatccaaatgttgatttttattcgggtattatccagaaagctatg----------gcaga
tgctacaactgttgatggtgtgggatttgaccaaactgcagttcctgcaaatgttgcagt
tcctctaaatgcagttattactgctagtgttcataagggtattaatttaaatactccagc
cggtagttttaacggtttgtttttaaatactgaaaacgatttagcagtgacagtgagtga
agatactaccttagggttcatcactcgtgctgttaataacgctaacttctttaaccttac
gcttaatgccggtaaaactcttactataacaggtcaaggtattactaatgtacaagctgc
tgctacaaaaaatgctcaaaatgttgttgtacaagttaataatggtgctgctattgaaaa
taatgatcttcaaagtgtaggaacaatagacttcggtgctgcggcttctacattagtatt
taatttagcaaatcctacaactcaaaaagtgcctcttatacttggagataatgctgtaat
agttaatggtgctaacggtacattaaatgttactaatggatttattaaagtttcaagtaa
aagttttgctactgttaaggcaattaatatcggtgacgg-
>r.africae Concatenation of 3 sequences
gagtttgatcctggctcagaacgaacgctatcggtatgcttaacacatgcaagtcgaacg
aactaatttttggggcttgctccaattagttagtggcagacgggtgagtaacacgtggga
atctacccattagtacggaataacttttagaaataaaagctaataccgtatattctctgc
ggaggaaagatttatcgctgatggatgagcccgcgtcagattaggtagttggtgaggtaa
tggctcaccaagccgacgatctgtagctggtctgagaggatgatcagccacactgggact
gagacacggcccagactcctacgggaggcagcagtggggaatattggacaatgggcgaaa
gcctgatccagcaataccgagtgagtgatgaaggccttagggttgtaaagctcttttagc
aaggaagataatgacgttac-----acctgctcacggcggggctaatgaagcggtaataa
atatgcttaaagaaatcggtagttctgagtatatt-cctaaatatatagctaaagctaag
gataaaaatgatccatttagattaatgggttttggtcatcgtgtatataaaaact-----
-----------------atgacccgcgtgccgcagtacttaaagaaacgtgcaaagaagt
attaa-------------aggaactcgggcagctaga----caacaatccgctcttacaa
atagcaatagaacttgaagctatcgctcttaaagatgaatattttattgagagaaaatta
tatccaaatgttgatttttattcgggtattatctataaagctatga------aacgcaga
tgctacaactgttgatggtgcgggatttgaccaaactgcagttcctgcaaatgttgcagt
tcctctaaatgcagttattactgctagtgttcataagggtattaatttaaatactccagc
cggtagttttaacggtttgtttttaaatactgcaaacaatttagcagtgacagtgagtga
agatactaccttagggttcatcactcgtgctgttaataacgctaacttctttaaccttac
gcttaatgccggtaaaactcttactataacaggtcaaggtattactaatgtacaagctgc
tgctacaaaaaatgctcaaaatgttgttgtacaagttaataatggtgctgctattgaaaa
taatgatcttcaaggtgtaggaacaatagacttcggtgctgcggcttctacattagtatt
taatttagcaaatcctacaactcaaaaagctcctcttatacttggagataatgctgtaat
agttaatggtgctaacggtacattaaatgttactaatggatttattaaagtttcaagtaa
aagttttgctactgttaatgcaattaatatcggtgac---
>R.conorii Concatenation of 3 sequences
gagtttgatcctggctcagaacgaacgctatcggtatgcttaacacatgcaagtcgaacg
gactaatt---ggggcttgctccagttagttagtggcagacgggtgagtaacacgtggga
atctacccattagtacggaataacttttagaaataaaagctaataccgtatattctctgc
ggaggaaagatttatcgctgatggatgagcccgcgtcagattaggtagttggtgaggtaa
tggctcaccaagccgacgatctgtagctggtctgagaggatgatcagccacactgggact
gagacacggcccagactcctacgggaggcagcagtggggaatattggacaatgggcgaaa
gcctgatccagcaataccgagtgagtgatgaaggccttagggttgtaaagctcttttagc
aaggaagataatgacgttac-----acctgctcacggcggggctaatgaagcggtaataa
atatgattaaagaaatcggtagttctgagtatatt-cctaaatatatagctaaagctaag
gataaaaatgatccatttagattaatgggttttggtcatcgtgtatataaaaact-----
-----------------atgacccgcgtgccgcagtacttaaagaaacgtgcaaagaagt
attaa-------------aggaactcgggcagctaga----caacaatccgttcttacaa
atagcaatagaacttgaagctatcgctcttaaagatgaatattttattgagagaaaatta
tatccaaatgttgatttttattcgggtattatctataaagctatgggt---aaacgcagt
tgctacaactgttgatggtgtgggatttgaccaaactgcagttcctgcaaatgttgcagt
tcctctaaatgcagttattactgctggtgttaataagggtattactttaaatactccagc
cggtagttttaacggtttgtttttaaatactgcaaacaatttagacgtgacagtgcgtga
agatactaccttagggttcatcactaatgttgttaataacgctaaccactttaaccttat
gcttaatgccggtaaaactcttactataacaggtcaaggtattactaatgtacaagctgc
tgctacaaaaaatgctaacaatgttgttgcacaagttaataatggtgctgctattgacaa
taatgatcttcaaggtgtaggaagaatagactgcggtgctgcggcttctacattagtatt
taatttagcaaatcctacaactcaaaaagctcctcttatacttggagataatgctgtaat
agttaatggtgctaacggtacattaaatgttactaatggatttattaaagtttcaagtaa
aagttttgctactgttaatgtaattaatatcggtgac---
>r.heilongjiangensis Concatenation of 3 sequences
gagtttgatcctggctcagaacgaacgctatcggtatgcttaacacatgcaagtcgaacg
gactaatt---ggggcttgctccaattagttagtggcagacgggtgagtaacacgtggga
atctacccatcagtacggaataacttttagaaataaaagctaataccgtatattctctgc
ggaggaaagatttattgctgatggatgagcccgcgtcagattaggtagttggtgaggtaa
tggctcaccaagccgacgatctgtagctggtctgagaggatgatcagccacactgggact
gagacacggcccagactcctacgggaggcagcagtggggaatattggacaatgggcgaaa
gcctgatccagcaataccgagtgagtgatgaaggccttagggttgtaaagctcttttagc
aaggaagataatgacgttac--gggacctgctcacggtggggctaatgaagcggtaataa
atatgcttaaagaaatcggtagttctgagtatatt-cctaaatatatagctaaagctaag
gataaaaatgatccatttaggttaatgggttttggtcatcgtgtatataaaaact-----
-----------------atgacccgcgtgccgcagtacttaaagaaacgtgcaaagaagt
attaa-------------aggaactcgggcagctaga----caacaatccgctcttacaa
atagcaatagaacttgaagctatcgctcttaaagatgaatattttattgagagaaaatta
tatccaaatgttgatttttattcgggtattatctataaggctatg--------ggggagt
tgctacaactgttgatggtgtgggatttgaccaaactgccggtcttgtaaatgttgcagt
tgctccaaatgcagttattactgctaatgctaataatggtattaatttaaatactccagc
cggtagttttaacggtttgtttttaaataatgcaaacaatttagcagtgacagtgagtga
agacactaccttagggttcatcaataa---tgctaataacgctaaccactttaaccttac
gcttggtgctgataaaactcttactataacaggtcaaggtattactaatgtacaagctgc
tgctacacacaatgctcaaaatattgttgcacaatttaatggtggtgctgctattgccaa
taatgaccttagcggtttaggaacaatagacttcggtgctgcggcttctacattagtatt
tgatttagcaaatcctacaactcaaaaagctcctcttatacttgcagataatgctttaat
agttaatggtgctaatggtacattaaatgttactaatggatttattcaagtttcagataa
aagttttgctactgttaaggcaattaatatcggtgacggt
>r.honei Concatenation of 3 sequences
gagtttgatcctggctcagaacgaacgctatcggtatgcttaacacatgcaagtcgaacg
gattaatt---ggggcttgctccaattagttagtggcagacgggtgagtaacacgtggga
atctacccatcagtacggaataacttttagaaataaaagctaataccgtatattctctgc
ggaggaaagatttatcgctgatggatgagcccgcgtcagattaggtagttggtgaggtaa
tggctcaccaagccgacgatctgtagctggtctgagaggatgatcagccacactgggact
gagacacggcccagactcctacgggaggcagcagtggggaatattggacaatgggcgaaa
gcctgatccagcaataccgagtgagtgatgaaggccttagggttgtaaagctcttttagc
aaggaagataatgacgttac-----acctgctcacggcggggctaatgaagcggtaataa
atatgcttaaagaaatcggtagttctgagtatatt-cctaaatatatagctaaagctaag
gataaaaatgatccatttagattaatgggttttggtcatcgtgtatataaaaact-----
-----------------atgacccgcgtgccgcagtacttaaagaaacgtgcaaagaagt
attaa-------------aggaactcgggcagctaga----caacaatccgctcttacaa
atagcaatagaacttgaagctatcgctcttaaagatgaatattttattgagagaaaatta
tatccaaatgttgatttttattcgggtattatctataaagctatg--------acagagc
tgctacaactgttgatggtgtgggatttgaccaaaatgccactcctgcagatgttgcagt
tgctctaaatgcagttattactgctaatgctaataatggtattactttaaatactccagc
cggtagttttaacggtttgcttttaaatactgcaaacaatttagtagtgacagtgggtga
agatactaccttaggatttatcactcgtgctgttaataacgttaactcctttaaccttac
gcttaatgccggtaaaactcttactataacaggtcaaggtattactaatgcacaagctgc
tgctacacaaaatgctaaaaatgttgttgtacaatttaataatggtgctgctattgacaa
taatgatcttaaaggtgtaggaagaatagacttccatgctgcgccttctacattagtatt
taatttagcaaatcctacaactcaagaagctcctcttatacttggagataatactgaaat
agttaatggtggtaacggtacgttaaatgttactaagggatttattcaagtttcaaataa
aagttttgctactgttaaggcaattaatatcgctgac---
>r.japonica Concatenation of 3 sequences
gagtttgatcctggctcagaacgaacgctatcggtatgcttaacacatgcaagtcgaacg
gactaatt---ggggcttgctccaattagttagtggcagacgggtgagtaacacgtggga
atctacccatcagtacggaataacttttagaaataaaagctaataccgtatattctctgc
ggaggaaagatttattgctgatggatgagcccgcgtcagattaggtagttggtgaggtaa
tggctcaccaagccgacgatctgtagctggtctgagaggatgatcagccacactgggact
gagacacggcccagactcctacgggaggcagcagtggggaatattggacaatgggcgaaa
gcctgatccagcaataccgagtgagtgatgaaggccttagggttgtaaagctcttttagc
aaggaagataatgacgttac--gggacctgctcacggtggggctaatgaagcggtaataa
atatgcttaaagaaatcggtagttctgagtatatt-cctaaatatatagctaaagctaag
gataaaaatgatccatttaggttaatgggttttggtcatcgtgtatataaaaact-----
-----------------atgacccgcgtgccgcagtacttaaagaaacgtgcaaagaagt
attaa-------------aggaactcgggcagctaga----caacaatccgctcttacaa
atagcaatagaacttgaagctatcgctcttaaagatgaatattttattgagagaaaatta
tatccaaatgttgatttttattcgggtattatctataaggctaaa--------acggagt
tgctacaactgttgatggtgtgggatttgaccaaactgtcgctcttgcaaatgttgcagt
tgctccaaatgcagttattactgctaatgctaataatggtattaatttaaatactccagc
tggtagttttaacggtttgtttttaagtaatgcaaacaatttagcagtgacagtgagtga
agatactaccttagggttcatcaataatgctgctaataacgctaaccgctttaaccttac
gcttgatgccggtaaaactcttactataacaggtcaaggtattactaatgtacaatctgc
tgctacacacaatgctcaaaatattgttgcaaaatttaatggtggtgctgctattgccaa
taatgaccttagcggtttaggaacaatagatttcggtgctgcggcttctacattagtatt
tgatttagcaaatcctacaactcaaaaagctcctcttatacttgcagataatgctttaat
agttaatggtgctaatggtacattaaatgttactaatggatttattcaagtttcagataa
aagttttgctactgttaaggcaattaatatcggtgac---
>r.massiliae Concatenation of 3 sequences
gagtttgatcctggctcagaacgaacgctatcggtatgcttaacacatgcaagtcgaacg
gactaatt---ggggcttgctccaattagttagtggcagacgggtgagtaacacgtggga
atctacccatcagtacggaataacttttagaaataaaagctaataccgtatattctctac
ggaggaaagatttatcgctgatggatgagcccgcgtcagattaggtagttggtgaggtaa
tggctcaccaagccgacgatctgtagctggtctgagaggatgatcagccacactgggact
gagacacggcccagactcctacgggaggcagcagtggggaatattggacaatgggcgaaa
gcctgatccagcaataccgagtgagtgatgaaggccttagggttgtaaagctcttttagc
aaggaagataatgacgttaca----------ctgcggcacgcgggtcatagtttttatat
atacgatgaccaaaacccattaacctaaatggatcatttttatccttagctttagctata
tatttagg-aatatactctgaactaccgatttctttaagcatatttattaccacttcatt
agccccgccgtgagcaggtccccaaagtgaggcaatacccgtgctaatacaagcaaaagg
gttagctccggatgagccggcaattcggactgttgaagtagaagcattctgctcatg---
---------------------atcggcatgtaggataaatatcttattaagagcattttt
tattattggatttacttt-------atatttcgtacaaggc-----------gacggagc
tgctacaactgttgatggtgcgggatttgaccaaactgtcgctcttgcaaatgttgcggt
tgctctaaatgcagttattactgctaatgctaataatggtattaatttaaatactccagc
cggtagttttaacggtttgtttttagatactgcaaacaatgtagcagtgacagtgagtgc
agatactaccttagggttcatcactaatgctgctaataacggtaactcctttgaccttac
gcttggtgccggtaaaactcttactataacaggtcaaggtattactaatgcacaagctgc
tgctacaaaaaatgctcaaaatgttgttgcaccatttaatggtggtgctgctattgccaa
taatgatcttagcggtgtaggaacaatagactggggtgctgcggattctacattagtatt
taatttagcaaatcctacaactcaaaaagctcctcttgtacttggaaataatgctgtaat
agctaatggtgttaacggtacattaaatgttactaatggatttattcaagtttcagataa
aagttttgctactgttaaggcaattaatatcggtgac---
>R.parkeri Concatenation of 3 sequences
gagtttgatcctggctcagaacgaacgctatcggtatgcttaacacatgcaagtcgaacg
gactaattt--ggggcttgctccaattagttagtggcagacgggtgagtaacacgtggga
atctacccattagtacggaataacttttagaaataaaagctaataccgtatattctctgc
ggaggaaagatttatcgctgatggatgagcccgcgtcagattaggtagttggtgaggtaa
tagctcaccaagccgacgatctgtagctggtctgagaggatgatcagccacactgggact
gagacacggcccagactcctacgggaggcagcagtggggaatattggacaatgggcgaaa
gcctgatccagcaataccgagtgagtgatgaaggccttagggttgtaaagctcttttagc
aaggaagataatgacgttac-----acctgctcacggcggggctaatgaagcggtaataa
atatgcttaaagaaatcggtagttctgagtatatt-cctaaatatatagctaaagctaag
gataaaaatgatccatttagattaatgggttttggtcatcgtgtatataaaaact-----
-----------------atgacccgcgtgccgcagtacttaaagaaacgtgcaaagaagt
attaa-------------aggaactcgggcagctaga----caacaatccgctcttacaa
atagcaatagaacttgaagctatcgctcttaaagatgaatattttattgagagaaaatta
tatccaaatgttgatttttattcgggtattatctataaagctatg---------cgcaga
tgctacaactgttgatggtgcgggatttgaccaaactgcagttcctgcaaatgttgcagt
tcctctaaatgcagttattactgctgctgctcataagggtattaatttaaatactccagc
cggtagttttaacggtttgtttttaaatactgcaaacaatttagcagtgacagtgagtga
agatactaccttagggttcatcactcgtgctgttaataacgctaacttctttaaccttac
gcttaatgccggtaaaactcttactataacaggtcaaggtattactaatgtacaagctgc
tgctacaaaaaatgctcaaaatgttgttgtacaagttaataatggtgctgctattgaaaa
taatgatcttcaaggtgtaggagaaatagacttcggtgctgcggcttctacattagtatt
taatttagcaaatcctacaactcaaaaagctcctcttatacttggagataatgctacaat
acttaatggtgctaacggtacattaaatgttactaatggatttattaaagtttcaagtaa
aagttttgctactgttaatgcaattaatatcggtgacggt
>r_peacockii Concatenation of 3 sequences
gagtttgatcctggctcagaacgaacgctatcggtatgcttaacacatgcaagtcgaacg
gactaatt---ggggcttgctccaattagttagtggcagacgggtgagtaacacgtggga
atctacccatcagtacggaataacttttagaaataaaagctaataccgtatattctctgc
ggaggaaagatttatcgctgatggatgagcccgcgtcagattaggtagttggtgaggtaa
tggctcaccaagccgacgatctgtagctggtctgagaggatgatcagccacactgggact
gagacacggcccagactcctacgggaggcagcagtggggaatattggacaatgggcgaaa
gcctgatccagcaataccgagtgagtgatgaaggccttagggttgtaaagctcttttagc
aaggaagataatgacgttactggggacctgctcacggcggggctaatgaagcggtaataa
atatgcttaaagaaatcggtagttctgagtatatt-cctaaatatatagctaaagctaag
gataaaaatgatccatttagattaatgggttttggtcatcgtgtatataaaaact-----
-----------------atgacccgcgtgccgtagtacttaaagaaacgtgcaaagaagt
attaa-------------aggaactcgggcagctaga----caacaatccgctcttacaa
atagcaatagaacttgaagctatcgctcttaaagatgaatattttattgagagaaaatta
tatccaaatgttgatttttattcgggtattatctataaagctaagaacaacaaacggagc
tgctacaactgttgatggtgcgggatttgaccaaactgccgttcttgcaaatgttggagt
tgctctaaatgcagttattactgctaatgctaataatggtattaatttaaatactccagc
cggtagttttaacggtttgtttttaaatactgcaaaccatttagcagtgacagtgagtga
agatactaccttagggttcatcactagtgctgttaataacgctcactcctttaaccttac
gcttaatgccggtaaaactcttactataacaggtcaaggtattactaatgcacaagctgc
tgctacaaaaaatgctcaaaatgttgttgtacaatttaataatggtgctgctattgacaa
taatgatcttaaaggtgtaggaagaatagacttcggtgctgcggcttctacattagtatt
taatttagcaaatcctacaactcaaaaagctcctcttatacttggagataatgctgtaat
agttcatggtaataacggtacattaaatgttactaatggatttattcaagtttcaaataa
aagttttgctactgttaaggcaattaata-----------
>R.raoultii Concatenation of 3 sequences
gagtttgatcctggctcagaacgaacgctatcggtatgcttaacacatgcaagtcgaacg
gactaatt---ggggcttgctccaattagttagtggcagacgggtgagtaacacgtggga
atctacccatcagtacggaataacttttagaaataaaagctaataccgcatattctctac
ggaggaaagatttatcgctgatggatgagcccgcgtcagattaggtagttggtgaggtaa
tggctcaccaagccgacgatctgtagctggtctgagaggatgatcagccacactgggact
gagacacggcccagactcctacgggaggcagcagtggggaatattggacaatgggcgaaa
gcctgatccagcaataccgagtgagtgatgaaggccttagggttgtaaagctcttttagc
aaggaagataatgacgttac-----acctgctcacggcggggctaatgaagcggtaataa
atatgcttaaagaaatcggtagttctgagtatatt-cctaaatatatagctaaagctaag
gataaaaatgatccatttaggttaatgggttttggtcatcgtgtatataaaaact-----
-----------------atgatccgcgtgccgcagtacttaaagaaacgtgcaaagaagt
attaa-------------aggaactcgggcagctaga----caacaatccgctcttacaa
atagcaatagaacttgaagctatcgctcttaaagatgaatattttattgagagaaaatta
tatccaaatgttgatttttattcgggtattatctataaagctatg--------acggagc
tgctacaactgttgatggtgcgggatttgaccaaactgccgctcctgcaaatgttgcggt
tgctctaaatgcagttattactgctaatgctaataatggtattaatttaaatactccagc
cggtagttttaacggtttgtttttagatactgcacacaatttagcagtgacagtgagtgc
agatactaccttagggttcatcactaaggctgctaataacggtaactcctttgaccttac
gcttggtgccggtaaaactcttactataacaggtcaaggtattactaatgcacaagctgc
tgttacaaaaaatgctcaaaatgttgttgcacaatttaatggtggtgctgctattgccaa
taatgatcttagcggtgtaggaacaatagacttgggtgctgcggcttctacattagtatt
taatttagcaaatcctacaactcaaaaagctcctcttatacttggaaataatgctgtaat
agctaatggtgttaacggtacattaaatgttactaatggatttattcaagtttcagataa
aagttttgctactgttaaggcaattaatatcgatgac---
>r.rhipicephali Concatenation of 3 sequences
gagtttgatcctggctcagaacgaacgctatcggtatgcttaacacatgcaagtcgaacg
ggctaatt---ggggcttgctccaattagttagtggcagacgggtgagtaacacgtggga
atctacccatcagtacggaataacttttagaaataaaagctaataccgtatattctctac
ggaggaaagatttatcgctgatggatgagcccgcgtcagattaggtagttggtgaggtaa
tggctcaccaagccgacgatctgtagctggtctgagaggatgatcagccacactgggact
gagacacggcccagactcctacgggaggcagcagtggggaatattggacaatgggcgaaa
gcctgatccagcaataccgagtgagtgatgaaggccttagggttgtaaagctcttttagc
aaggaagataatgacgttac----gacctgctcacggcggggctaatgaagtggtaataa
atatgcttaaagaaatcggtagttcagagtatatt-cctaaatatatagctaaagctaag
gataaaaatgatccatttaggttaatgggttttggtcatcgtatatataaaaact-----
-----------------atgacccgcgtgccgcagtacttaaagaaacgtgcaaagaagt
attaa-------------aggaactcgggcagctaga----caacaatccgctcttacaa
atagcaatagaacttgaagctatcgctcttaaagatgaatattttattgagagaaaatta
tatccaaatgttgatttttattcgggtattatctataaagctatggg----aaacagagc
tgctacaactgttgatggtgcgggatttgaccaaactgtcgctcctgcaaatgttgcggt
tgctctaaatgcagttattactgctaatgctaataatggtattaatttaaatactccagc
cggtagttttaacggtttgtttttagatactgcaaacaatttagcagtgacagtgagtgc
agatactaccttagggttcatcactaatgctgctaatcaaggtaactcctttgaccttat
gcttggtgctggtaaaactcttactataacaggtcaaggtattactaatgcacaagctgc
tgttacaaaaaatgctcaaaatgttgttgcacaatttaatggtggtgctgctattgccaa
taatgatcttagcggtgtaggaacaatagactggggtgctgcggattctacattagtatt
taatttagcaaatcctacaactcaaaaagctcctcttgtacttggaaataatactgtaat
agctaatggtgttaacggtacattaaatgttactaatggatttattcaagtttcagataa
aagttttgctactgttaaggcaattaatatcgatgac---
>r.rickettssii Concatenation of 3 sequences
gagtttgatcctggctcagaacgaacgctatcggtatgcttaacacatgcaagtcgaacg
gactaatt---ggggcttgctccaattagttagtggcagacgggtgagtaacacgtggga
atctacccatcagtacggaataacttttagaaataaaagctaataccgtatattctctgc
ggaggaaagatttatcgctgatggatgagcccgcgtcagattaggtagttggtgaggtaa
tggctcaccaagccgacgatctgtagctggtctgagaggatgatcagccacactgggact
gagacacggcccagactcctacgggaggcagcagtggggaatattggacaatgggcgaaa
gcctgatccagcaataccgagtgagtgatgaaggccttagggttgtaaagctcttttagc
aaggaagataatgacgttac--gggacctgctcacggcggggctaatgaagcggtaataa
atatgcttaaagaaatcggtagttctgagtatatt-cctaaatatatagctaaagctaag
gataaaaatgatccatttagattaatgggttttggtcatcgtgtatataaaaact-----
-----------------atgacccgcgtgccgtagtacttaaagaaacgtgcaaagaagt
attaa-------------aggaactcgggcagctaga----caacaatcta---ttacaa
atagcaatagaacttgaagctatcgctcttaaagatgaatattttattgagagaaaatta
tatccaaatgttgatttttattcgggtattatctataaagctatg------aaacggcgc
tgctacaactgttgatggtgcgggatttgaccaaactgccgctcctgcaaatgttggagt
tgctctaaatgcagttattactgctaatgctaataatggtattaatttcaatactccagc
cggtagttttaacggtttgttgttaaatactgcaaacaatttagcagtgacagtgagtga
agatactaccttagggttcatcactaatgttgttcataacgctcactcctttaaccttac
gcttaatgccggtaaaactcttactataacaggtcaaggtgttactaatgcacaagctgc
tgctacaaaaaatgctcaaaatgttgttgtacaatttaataatggtgctgctattgacaa
taatgatcttaaaggtgtaggaagaatagacttcggtgctccggcttctacattagtatt
taatttagcaaatcctacaactcaaaaagctcctcttatacttggagataatgctgtaat
agctaatggtgttaacggtacattaaatgttactaatggatttattcaagtttcaaataa
aagttttgctactgttaaggcaattaatatcgctgac---
>r.slovaca Concatenation of 3 sequences
gagtttgatcctggctcagaacgaacgctatcggtatgcttaacacatgcaagtcgaacg
gactaatt---ggggcttgctccaattagttagtggcagacgggtgagtaacacgtggga
atctacccatcagtacggaataacttttagaaataaaagctaataccgtatattctctgc
ggaggaaagatttatcgctgatggatgagcccgcgtcagattaggtagttggtgaggtaa
tggctcaccaagccgacgatctgtagctggtctgagaggatgatcagccacactgggact
gagacacggcccagactcctacgggaggcagcagtggggaatattggacaatgggcgaaa
gcctgatccagcaataccgagtgagtgatgaaggccttagggttgtaaagctcttttagc
aaggaagataatgacgttac--gggacctgctcacggcggggctaatgaagcggtaataa
atatgcttaaagaaatcggtagttctgagtatatt-cctaaatatatagctaaagctaag
gataaaaatgatccatttagattaatgggttttggtcatcgtgtatataaaaact-----
-----------------atgacccgcgtgccgcagtacttaaagaaacgtgcaaagaagt
attaa-------------aggaactcgggcagctaga----caacaatccgctcttacaa
atagcaatagaacttgaagctattgctcttaaagatgaatattttattgagagaaaatta
tatccaaatgttgatttttattcgggtattatctataaagcta--------aaacggagt
tgctacaactgttgatggtgcgggatttgaccaaactgcagttcctgcaaatgttgcagt
tgctctaaatgcagttattactgctaatgctcataagggtattaatttaaatactccagc
cggtagttttaacggtttgtttttagatactgcaaacaatttagcagtgacagtgagtga
agatactaccttagggttcatcactaatgttgttaataacgctaacttctttaaccttac
gcttaatgccggtaaaactcttactataacaggtcaaggtattactaatgcacaagctgc
tgctacaaaaaatgctcaaaatgttgttgtacaatgtaataatggtgctgctattggcaa
taatgatcttaaaggtgtaggaagcatagacttcggtgctgcggcttctacattagtatt
taatttagcaaatcctacaactcaaaaagctcctcttatacttggagataatgctttaat
agttaatggtgctaacggtacattaaatgttactaatggatttattcaagtttcaagtaa
aagttttgctactgttaatgcaattaatatcggtgac---
>TICK1 Concatenation of 3 sequences
gagtttgatcctggctcagaacgaacgctatcggtatgcttaacacatgcaagtcgaacg
gactaattttgggggtttgctccaattagttagtggcagacgggtgagtaacacgtggga
atctacccattagtacggaataacttttagaaataaaagctaataccgtatattctctgc
ggaggaaagatttatcgctgatggatgagcccgcgtcagattaggtagttggtgaggtaa
tggctcaccaagccgacgatctgtagctggtctgagaggatgatcagccacactgggact
gagacacggcccagactcctacgggaggcagcagtggggaatattggacaatgggcgaaa
gcctgatccagcaataccgagtgagtgatgaaggccttagggttgtaaaactcttttagc
aaggaagataatgacgttac-----acctgctcacggcggggctaatgaagcggtaataa
atatgcttaaagaaatcggtagttctgagtatatt-cctaaatatatagctaaagctaag
gataaaaatgatccatttagattaatgggttttggtcatcgtgtatataaaaact-----
-----------------atgatccgcgtgccgcagtacttaaagaaacgtgcaaagaagt
attaa-------------aggaactcgggcagctaga----caacaatccgctcttacaa
atagcaatagaacttgaagctatcgctcttaaagatgaatattttattgagagaaaatta
tatccaaatgttgatttttattcgggtattatctataaagctatg---------cgcaga
tgctacaactgttgatggtgtgggatttgaccaaactgcagttcctgcaaatgttgcagt
tcctctaaatgcagttattactgctagtgttcataagggtattaatttaaatactccagc
cggtagttttaacggtttgtttttaaatactgaaaacgatttagcagtgacagtgagtga
agatactaccttagggttcatcactcgtgctgttaataacgctaacttctttaaccttac
gcttaatgccggtaaaactcttactataacaggtcaaggtattactaatgtacaagctgc
tgctacaaaaaatgctcaaaatgttgttgtacaagttaataatggtgctgctattgaaaa
taatgatcttcaaagtgtaggaacaatagacttcggtgctgcggcttctacattagtatt
taatttagcaaatcctacaactcaaaaagtgcctcttatacttggagataatgctgtaat
agttaatggtgctaacggtacattaaatgttactaatggatttattaaagtttcaagtaa
aagttttgctactgttaatgcaattaatatcggtgacggt
