# Supplementary material for: Metagenomic profiling of ticks: Identification of novel rickettsial genomes and detection of tick-borne canine parvovirus
Source: PLoS Negl Trop Dis. 2019 Jan 14;13(1):e0006805. doi: 10.1371/journal.pntd.0006805 (PMC6347332; doi:10.1371/journal.pntd.0006805)
Supplement: S1 Table — (XLSX) [file pntd.0006805.s001.xlsx]

## Sheet: Sheet1
Num samples	32
Num observations	33402
Total count	4467812
Table density (fraction of non-zero values)	0.078
Counts/sample summary
Min	43504
Max	256654
Median	132387
Mean	139619
Std. dev.	64195.6
Sample Metadata Categories	None provided
Observation Metadata Categories	taxonomy
Counts/sample detail
TP7	43504
TP19	50089
TP31	59361
TP26	66537
TP22	68482
TP27	70462
TP23	71014
TP12	75058
TP13	75416
TP8	76210
TP18	91494
TP30	100628
TP2	113929
TP6	123492
TP21	124158
TP16	131295
TP28	133479
TP32	153656
TP20	163208
TP17	165438
TP24	168470
TP3	169567
TP5	178516
TP9	181266
TP10	193338
TP14	205598
TP4	209653
TP15	223750
TP1	224123
TP29	244606
TP11	255361
TP25	256654

## Sheet: Sheet3
Tick pool	Number of sequences	Sequences after quality filtering	Sequences used for OTU picking
TP1	236003	224651	224123
TP2	123896	114598	113929
TP3	180002	170445	169567
TP4	226849	212674	209653
TP5	188704	179416	178516
TP6	130154	124044	123492
TP7	45997	43673	43504
TP8	81005	76475	76210
TP9	181422	189226	181266
TP10	201751	193511	193338
TP11	267729	255628	255361
TP12	79606	75181	75058
TP13	80068	75533	75416
TP14	215473	205773	205598
TP15	234252	223998	223750
TP16	147921	131991	131295
TP17	175853	166005	165438
TP18	98732	91886	91494
TP19	53069	50221	50089
TP20	174469	163637	163208
TP21	131508	124692	124158
TP22	72045	68621	68482
TP23	74774	71260	71014
TP24	176996	168983	168470
TP25	269609	257095	256654
TP26	70170	66742	66537
TP27	75846	70652	70462
TP28	142902	134225	133479
TP29	260447	246868	244606
TP30	105747	100903	100628
TP31	62611	59558	59361
TP32	163178	153927	153656

## Sheet: Sheet4
Input file paths
Sequence read filepath	../TP9_S16_L001_R1_001/fastqjoin.join.fastq (md5	f728db09a83b3735e8ab1aff35449768)
Quality filter results
Total number of input sequences	189226
Barcode not in mapping file	0
Read too short after quality truncation	7804
Count of N characters exceeds limit	0
Illumina quality digit = 0	0
Barcode errors exceed max	0
Result summary (after quality filtering)
Median sequence length	440
TP9	181422
Total number seqs written	181422
---
Input file paths
Sequence read filepath	../TP8_S15_L001_R1_001/fastqjoin.join.fastq (md5	52a52d4272fd57e84802d98a89809a11)
Quality filter results
Total number of input sequences	81005
Barcode not in mapping file	0
Read too short after quality truncation	4530
Count of N characters exceeds limit	0
Illumina quality digit = 0	0
Barcode errors exceed max	0
Result summary (after quality filtering)
Median sequence length	464
TP8	76475
Total number seqs written	76475
---
Input file paths
Sequence read filepath	../TP7_S14_L001_R1_001/fastqjoin.join.fastq (md5	c9aa0a1dcb67124d25adbe584ca65f4a)
Quality filter results
Total number of input sequences	45997
Barcode not in mapping file	0
Read too short after quality truncation	2324
Count of N characters exceeds limit	0
Illumina quality digit = 0	0
Barcode errors exceed max	0
Result summary (after quality filtering)
Median sequence length	465
TP7	43673
Total number seqs written	43673
---
Input file paths
Sequence read filepath	../TP6_S13_L001_R1_001/fastqjoin.join.fastq (md5	6dd37af6fcc59e399ab9d0077e2dcd13)
Quality filter results
Total number of input sequences	130154
Barcode not in mapping file	0
Read too short after quality truncation	6109
Count of N characters exceeds limit	1
Illumina quality digit = 0	0
Barcode errors exceed max	0
Result summary (after quality filtering)
Median sequence length	460
TP6	124044
Total number seqs written	124044
---
Input file paths
Sequence read filepath	../TP5_S12_L001_R1_001/fastqjoin.join.fastq (md5	d9284ed9919aaf3cb6c617b6595dd9a5)
Quality filter results
Total number of input sequences	188704
Barcode not in mapping file	0
Read too short after quality truncation	9287
Count of N characters exceeds limit	1
Illumina quality digit = 0	0
Barcode errors exceed max	0
Result summary (after quality filtering)
Median sequence length	460
TP5	179416
Total number seqs written	179416
---
Input file paths
Sequence read filepath	../TP4_S11_L001_R1_001/fastqjoin.join.fastq (md5	8b58ec839a4cbaeb43ea6d6f62f593f8)
Quality filter results
Total number of input sequences	226849
Barcode not in mapping file	0
Read too short after quality truncation	14173
Count of N characters exceeds limit	2
Illumina quality digit = 0	0
Barcode errors exceed max	0
Result summary (after quality filtering)
Median sequence length	464
TP4	212674
Total number seqs written	212674
---
Input file paths
Sequence read filepath	../TP3_S10_L001_R1_001/fastqjoin.join.fastq (md5	dda383071f28cfa10b94688b0d011294)
Quality filter results
Total number of input sequences	180002
Barcode not in mapping file	0
Read too short after quality truncation	9557
Count of N characters exceeds limit	0
Illumina quality digit = 0	0
Barcode errors exceed max	0
Result summary (after quality filtering)
Median sequence length	465
TP3	170445
Total number seqs written	170445
---
Input file paths
Sequence read filepath	../TP32_S39_L001_R1_001/fastqjoin.join.fastq (md5	733c7784058ec1320c381e1bdb388a49)
Quality filter results
Total number of input sequences	163178
Barcode not in mapping file	0
Read too short after quality truncation	9251
Count of N characters exceeds limit	0
Illumina quality digit = 0	0
Barcode errors exceed max	0
Result summary (after quality filtering)
Median sequence length	467
TP32	153927
Total number seqs written	153927
---
Input file paths
Sequence read filepath	../TP31_S38_L001_R1_001/fastqjoin.join.fastq (md5	dda4955785c299fe59cd264945bcd05d)
Quality filter results
Total number of input sequences	62611
Barcode not in mapping file	0
Read too short after quality truncation	3053
Count of N characters exceeds limit	0
Illumina quality digit = 0	0
Barcode errors exceed max	0
Result summary (after quality filtering)
Median sequence length	465
TP31	59558
Total number seqs written	59558
---
Input file paths
Sequence read filepath	../TP30_S37_L001_R1_001/fastqjoin.join.fastq (md5	921c45ddfde8072df7462b77f4542a66)
Quality filter results
Total number of input sequences	105747
Barcode not in mapping file	0
Read too short after quality truncation	4843
Count of N characters exceeds limit	1
Illumina quality digit = 0	0
Barcode errors exceed max	0
Result summary (after quality filtering)
Median sequence length	467
TP30	100903
Total number seqs written	100903
---
Input file paths
Sequence read filepath	../TP2_S9_L001_R1_001/fastqjoin.join.fastq (md5	161ae44f70e377f0fa22d54878e171e0)
Quality filter results
Total number of input sequences	123896
Barcode not in mapping file	0
Read too short after quality truncation	9297
Count of N characters exceeds limit	1
Illumina quality digit = 0	0
Barcode errors exceed max	0
Result summary (after quality filtering)
Median sequence length	461
TP2	114598
Total number seqs written	114598
---
Input file paths
Sequence read filepath	../TP29_S36_L001_R1_001/fastqjoin.join.fastq (md5	20639e3d599bf82420fea0642599963a)
Quality filter results
Total number of input sequences	260447
Barcode not in mapping file	0
Read too short after quality truncation	13577
Count of N characters exceeds limit	2
Illumina quality digit = 0	0
Barcode errors exceed max	0
Result summary (after quality filtering)
Median sequence length	459
TP29	246868
Total number seqs written	246868
---
Input file paths
Sequence read filepath	../TP28_S35_L001_R1_001/fastqjoin.join.fastq (md5	e6988df0036f2709e07f6745a8b2cd63)
Quality filter results
Total number of input sequences	142902
Barcode not in mapping file	0
Read too short after quality truncation	8675
Count of N characters exceeds limit	2
Illumina quality digit = 0	0
Barcode errors exceed max	0
Result summary (after quality filtering)
Median sequence length	460
TP28	134225
Total number seqs written	134225
---
Input file paths
Sequence read filepath	../TP27_S34_L001_R1_001/fastqjoin.join.fastq (md5	91e82a1a012b96f5ffeb16c486c792c0)
Quality filter results
Total number of input sequences	75846
Barcode not in mapping file	0
Read too short after quality truncation	5194
Count of N characters exceeds limit	0
Illumina quality digit = 0	0
Barcode errors exceed max	0
Result summary (after quality filtering)
Median sequence length	467
TP27	70652
Total number seqs written	70652
---
Input file paths
Sequence read filepath	../TP26_S33_L001_R1_001/fastqjoin.join.fastq (md5	ae6e9b77e5a7c1997ea165bf2dd68aec)
Quality filter results
Total number of input sequences	70170
Barcode not in mapping file	0
Read too short after quality truncation	3428
Count of N characters exceeds limit	0
Illumina quality digit = 0	0
Barcode errors exceed max	0
Result summary (after quality filtering)
Median sequence length	465
TP26	66742
Total number seqs written	66742
---
Input file paths
Sequence read filepath	../TP25_S32_L001_R1_001/fastqjoin.join.fastq (md5	2c2d723a92d5fc28b8c3570dca423d55)
Quality filter results
Total number of input sequences	269609
Barcode not in mapping file	0
Read too short after quality truncation	12512
Count of N characters exceeds limit	2
Illumina quality digit = 0	0
Barcode errors exceed max	0
Result summary (after quality filtering)
Median sequence length	465
TP25	257095
Total number seqs written	257095
---
Input file paths
Sequence read filepath	../TP24_S31_L001_R1_001/fastqjoin.join.fastq (md5	6e03a89ba1ab8243606b3aa016b9d5d5)
Quality filter results
Total number of input sequences	176996
Barcode not in mapping file	0
Read too short after quality truncation	8013
Count of N characters exceeds limit	0
Illumina quality digit = 0	0
Barcode errors exceed max	0
Result summary (after quality filtering)
Median sequence length	465
TP24	168983
Total number seqs written	168983
---
Input file paths
Sequence read filepath	../TP23_S30_L001_R1_001/fastqjoin.join.fastq (md5	e81cd3bfc6841505cf13fbc6e5d0023b)
Quality filter results
Total number of input sequences	74774
Barcode not in mapping file	0
Read too short after quality truncation	3514
Count of N characters exceeds limit	0
Illumina quality digit = 0	0
Barcode errors exceed max	0
Result summary (after quality filtering)
Median sequence length	465
TP23	71260
Total number seqs written	71260
---
Input file paths
Sequence read filepath	../TP22_S29_L001_R1_001/fastqjoin.join.fastq (md5	3d1a81c0aad5624b29ac86c21a804cde)
Quality filter results
Total number of input sequences	72045
Barcode not in mapping file	0
Read too short after quality truncation	3424
Count of N characters exceeds limit	0
Illumina quality digit = 0	0
Barcode errors exceed max	0
Result summary (after quality filtering)
Median sequence length	467
TP22	68621
Total number seqs written	68621
---
Input file paths
Sequence read filepath	../TP21_S28_L001_R1_001/fastqjoin.join.fastq (md5	4b84be0764258d56e79971c23586a811)
Quality filter results
Total number of input sequences	131508
Barcode not in mapping file	0
Read too short after quality truncation	6815
Count of N characters exceeds limit	1
Illumina quality digit = 0	0
Barcode errors exceed max	0
Result summary (after quality filtering)
Median sequence length	464
TP21	124692
Total number seqs written	124692
---
Input file paths
Sequence read filepath	../TP20_S27_L001_R1_001/fastqjoin.join.fastq (md5	613b6758755d41047c2c3c442992b8cd)
Quality filter results
Total number of input sequences	174469
Barcode not in mapping file	0
Read too short after quality truncation	10830
Count of N characters exceeds limit	2
Illumina quality digit = 0	0
Barcode errors exceed max	0
Result summary (after quality filtering)
Median sequence length	465
TP20	163637
Total number seqs written	163637
---
Input file paths
Sequence read filepath	../TP1_S8_L001_R1_001/fastqjoin.join.fastq (md5	bec86adb8a04296165ce8206704e1725)
Quality filter results
Total number of input sequences	236003
Barcode not in mapping file	0
Read too short after quality truncation	11351
Count of N characters exceeds limit	1
Illumina quality digit = 0	0
Barcode errors exceed max	0
Result summary (after quality filtering)
Median sequence length	440
TP1	224651
Total number seqs written	224651
---
Input file paths
Sequence read filepath	../TP19_S26_L001_R1_001/fastqjoin.join.fastq (md5	01435a9bc80db98f64d78e8e0cc58f22)
Quality filter results
Total number of input sequences	53069
Barcode not in mapping file	0
Read too short after quality truncation	2847
Count of N characters exceeds limit	1
Illumina quality digit = 0	0
Barcode errors exceed max	0
Result summary (after quality filtering)
Median sequence length	465
TP19	50221
Total number seqs written	50221
---
Input file paths
Sequence read filepath	../TP18_S25_L001_R1_001/fastqjoin.join.fastq (md5	404563ce50fe45180a3d066ff5bd9be2)
Quality filter results
Total number of input sequences	98732
Barcode not in mapping file	0
Read too short after quality truncation	6845
Count of N characters exceeds limit	1
Illumina quality digit = 0	0
Barcode errors exceed max	0
Result summary (after quality filtering)
Median sequence length	465
TP18	91886
Total number seqs written	91886
---
Input file paths
Sequence read filepath	../TP17_S24_L001_R1_001/fastqjoin.join.fastq (md5	fce315c5578acf447fa8b31fefde0324)
Quality filter results
Total number of input sequences	175853
Barcode not in mapping file	0
Read too short after quality truncation	9847
Count of N characters exceeds limit	1
Illumina quality digit = 0	0
Barcode errors exceed max	0
Result summary (after quality filtering)
Median sequence length	467
TP17	166005
Total number seqs written	166005
---
Input file paths
Sequence read filepath	../TP16_S23_L001_R1_001/fastqjoin.join.fastq (md5	932b8375738bfe540f17c1b154825030)
Quality filter results
Total number of input sequences	147921
Barcode not in mapping file	0
Read too short after quality truncation	15928
Count of N characters exceeds limit	2
Illumina quality digit = 0	0
Barcode errors exceed max	0
Result summary (after quality filtering)
Median sequence length	464
TP16	131991
Total number seqs written	131991
---
Input file paths
Sequence read filepath	../TP15_S22_L001_R1_001/fastqjoin.join.fastq (md5	3f426f8b517e62e70925cfc0fb286d4c)
Quality filter results
Total number of input sequences	234252
Barcode not in mapping file	0
Read too short after quality truncation	10253
Count of N characters exceeds limit	1
Illumina quality digit = 0	0
Barcode errors exceed max	0
Result summary (after quality filtering)
Median sequence length	440
TP15	223998
Total number seqs written	223998
---
Input file paths
Sequence read filepath	../TP14_S21_L001_R1_001/fastqjoin.join.fastq (md5	0884fa7e9c541f52471154f0419cd2a7)
Quality filter results
Total number of input sequences	215473
Barcode not in mapping file	0
Read too short after quality truncation	9696
Count of N characters exceeds limit	4
Illumina quality digit = 0	0
Barcode errors exceed max	0
Result summary (after quality filtering)
Median sequence length	467
TP14	205773
Total number seqs written	205773
---
Input file paths
Sequence read filepath	../TP13_S20_L001_R1_001/fastqjoin.join.fastq (md5	03c33337fddb514b73ae6129cf8a7c30)
Quality filter results
Total number of input sequences	80068
Barcode not in mapping file	0
Read too short after quality truncation	4535
Count of N characters exceeds limit	0
Illumina quality digit = 0	0
Barcode errors exceed max	0
Result summary (after quality filtering)
Median sequence length	467
TP13	75533
Total number seqs written	75533
---
Input file paths
Sequence read filepath	../TP12_S19_L001_R1_001/fastqjoin.join.fastq (md5	777bf9aa435d0058808e8284ec140579)
Quality filter results
Total number of input sequences	79606
Barcode not in mapping file	0
Read too short after quality truncation	4425
Count of N characters exceeds limit	0
Illumina quality digit = 0	0
Barcode errors exceed max	0
Result summary (after quality filtering)
Median sequence length	467
TP12	75181
Total number seqs written	75181
---
Input file paths
Sequence read filepath	../TP11_S18_L001_R1_001/fastqjoin.join.fastq (md5	f9129d2689a82eabef35d39bca51f299)
Quality filter results
Total number of input sequences	267729
Barcode not in mapping file	0
Read too short after quality truncation	12100
Count of N characters exceeds limit	1
Illumina quality digit = 0	0
Barcode errors exceed max	0
Result summary (after quality filtering)
Median sequence length	465
TP11	255628
Total number seqs written	255628
---
Input file paths
Sequence read filepath	../TP10_S17_L001_R1_001/fastqjoin.join.fastq (md5	86564ebfa5d18e663508bf5381c2faa2)
Quality filter results
Total number of input sequences	201751
Barcode not in mapping file	0
Read too short after quality truncation	8239
Count of N characters exceeds limit	1
Illumina quality digit = 0	0
Barcode errors exceed max	0
Result summary (after quality filtering)
Median sequence length	465
TP10	193511
Total number seqs written	193511
---
