# Supplementary material for: Metagenomic profiling of ticks: Identification of novel rickettsial genomes and detection of tick-borne canine parvovirus
Source: PLoS Negl Trop Dis. 2019 Jan 14;13(1):e0006805. doi: 10.1371/journal.pntd.0006805 (PMC6347332; doi:10.1371/journal.pntd.0006805)
Supplement: S7 Table — (XLSX) [file pntd.0006805.s007.xlsx]

## Sheet: snps_Rm_Nablus
CHROM	POS	TYPE	REF	ALT	EVIDENCE
NC_009900.1	33811	snp	A	G	G:13 A:0
NC_009900.1	36322	snp	C	T	T:13 C:0
NC_009900.1	46013	snp	A	G	G:23 A:0
NC_009900.1	65019	snp	G	A	A:10 G:0
NC_009900.1	72206	snp	T	C	C:10 T:0
NC_009900.1	101142	snp	G	A	A:11 G:1
NC_009900.1	109708	snp	A	G	G:10 A:0
NC_009900.1	117098	snp	G	A	A:17 G:0
NC_009900.1	126676	snp	A	G	G:13 A:0
NC_009900.1	132883	ins	GA	GCA	GCA:20 GA:0
NC_009900.1	137270	snp	T	C	C:17 T:0
NC_009900.1	143072	snp	A	G	G:16 A:0
NC_009900.1	147390	snp	G	A	A:14 G:0
NC_009900.1	152045	snp	A	G	G:21 A:0
NC_009900.1	152944	del	TAA	TA	TA:26 TAA:0
NC_009900.1	157648	snp	G	A	A:13 G:0
NC_009900.1	193449	snp	C	T	T:12 C:0
NC_009900.1	193674	snp	T	G	G:16 T:0
NC_009900.1	194573	snp	G	A	A:11 G:0
NC_009900.1	208201	del	GTT	GT	GT:11 GTT:0
NC_009900.1	208691	snp	G	T	T:11 G:0
NC_009900.1	214166	snp	A	G	G:14 A:0
NC_009900.1	215099	snp	T	C	C:19 T:0
NC_009900.1	235893	snp	T	C	C:19 T:0
NC_009900.1	239192	ins	CTTTTTTTC	CTTTTTTTTC	CTTTTTTTTC:16 CTTTTTTTC:0
NC_009900.1	239382	snp	T	C	C:14 T:0
NC_009900.1	259850	snp	C	T	T:11 C:0
NC_009900.1	260595	snp	G	A	A:17 G:0
NC_009900.1	270226	snp	C	T	T:20 C:0
NC_009900.1	293008	snp	G	A	A:10 G:0
NC_009900.1	295687	del	TGG	TG	TG:14 TGG:0
NC_009900.1	295878	snp	T	C	C:10 T:0
NC_009900.1	298011	snp	T	C	C:12 T:0
NC_009900.1	303495	snp	A	C	C:16 A:0
NC_009900.1	305809	snp	A	G	G:10 A:0
NC_009900.1	325477	snp	C	A	A:15 C:0
NC_009900.1	329203	snp	G	A	A:16 G:0
NC_009900.1	332198	ins	AGG	AGGG	AGGG:41 AGG:0
NC_009900.1	342716	snp	C	T	T:14 C:0
NC_009900.1	344686	snp	C	T	T:13 C:0
NC_009900.1	365394	snp	G	A	A:16 G:0
NC_009900.1	379012	snp	G	A	A:11 G:0
NC_009900.1	381208	snp	T	C	C:16 T:0
NC_009900.1	384071	ins	GGTA	GGTGTA	GGTGTA:24 GGTA:0
NC_009900.1	390979	snp	T	C	C:13 T:0
NC_009900.1	416297	snp	T	C	C:12 T:0
NC_009900.1	422473	del	AGGGGGGGGGT	AGT	AGT:11 AGGGGGGGGGT:0
NC_009900.1	436139	snp	A	G	G:17 A:0
NC_009900.1	438770	snp	A	G	G:31 A:0
NC_009900.1	453076	snp	A	T	T:12 A:0
NC_009900.1	453128	snp	T	C	C:14 T:0
NC_009900.1	456820	ins	TAAAAAG	TAAAAAAG	TAAAAAAG:11 TAAAAAG:0
NC_009900.1	472334	snp	T	C	C:10 T:0
NC_009900.1	474961	snp	T	C	C:11 T:0
NC_009900.1	481985	snp	T	G	G:14 T:0
NC_009900.1	493918	snp	A	G	G:10 A:0
NC_009900.1	509891	snp	C	T	T:17 C:0
NC_009900.1	519815	snp	G	T	T:13 G:0
NC_009900.1	521538	snp	G	A	A:19 G:0
NC_009900.1	522755	snp	T	G	G:25 T:0
NC_009900.1	537988	snp	A	G	G:11 A:0
NC_009900.1	548442	snp	G	A	A:14 G:0
NC_009900.1	551889	snp	G	A	A:14 G:0
NC_009900.1	558633	snp	C	G	G:15 C:0
NC_009900.1	561790	snp	G	A	A:14 G:0
NC_009900.1	568903	snp	A	C	C:15 A:0
NC_009900.1	600280	snp	T	C	C:10 T:0
NC_009900.1	601175	snp	A	C	C:11 A:0
NC_009900.1	625605	snp	C	T	T:28 C:0
NC_009900.1	648268	snp	T	C	C:19 T:0
NC_009900.1	654839	snp	T	C	C:19 T:0
NC_009900.1	666838	ins	AAGTA	AAGTAGTA	AAGTAGTA:14 AAGTA:1
NC_009900.1	676413	snp	A	G	G:11 A:0
NC_009900.1	683590	snp	C	T	T:15 C:0
NC_009900.1	707347	complex	ACCG	TCTT	TCTT:12 ACCG:0
NC_009900.1	718621	del	CAAAAAAAAT	CAAAAAAAT	CAAAAAAAT:19 CAAAAAAAAT:0
NC_009900.1	737789	snp	A	G	G:26 A:0
NC_009900.1	754426	snp	G	A	A:25 G:0
NC_009900.1	762912	snp	C	T	T:14 C:0
NC_009900.1	783978	snp	G	T	T:15 G:0
NC_009900.1	800073	snp	C	T	T:10 C:0
NC_009900.1	830231	snp	T	C	C:17 T:0
NC_009900.1	844097	snp	G	A	A:15 G:0
NC_009900.1	851322	snp	C	T	T:11 C:0
NC_009900.1	862260	del	CTTTTTA	CTTTA	CTTTA:13 CTTTTTA:0
NC_009900.1	943013	del	AGATC	AC	AC:18 AGATC:0
NC_009900.1	946176	snp	T	C	C:11 T:0
NC_009900.1	952421	del	GTTTTTG	GTTTG	GTTTG:15 GTTTTTG:0
NC_009900.1	952839	snp	T	A	A:12 T:0
NC_009900.1	987449	snp	T	C	C:15 T:0
NC_009900.1	989487	snp	T	C	C:14 T:0
NC_009900.1	991519	snp	A	C	C:32 A:0
NC_009900.1	1000777	del	AGTG	AG	AG:16 AGTG:0
NC_009900.1	1007283	snp	A	C	C:11 A:0
NC_009900.1	1010746	snp	A	C	C:25 A:0
NC_009900.1	1024726	snp	C	T	T:15 C:0
NC_009900.1	1067084	snp	T	C	C:10 T:0
NC_009900.1	1077263	del	AATATATC	AATATC	AATATC:15 AATATATC:0
NC_009900.1	1108792	snp	T	C	C:14 T:0
NC_009900.1	1132746	snp	T	C	C:11 T:0
NC_009900.1	1135661	snp	A	C	C:10 A:0
NC_009900.1	1146026	del	CTTTTTA	CTTTA	CTTTA:10 CTTTTTA:0
NC_009900.1	1157041	snp	A	G	G:17 A:0
NC_009900.1	1160039	snp	C	T	T:12 C:0
NC_009900.1	1163664	snp	T	C	C:11 T:0
NC_009900.1	1165294	snp	C	T	T:14 C:0
NC_009900.1	1174661	snp	G	A	A:14 G:0
NC_009900.1	1200832	snp	T	C	C:14 T:0
NC_009900.1	1225634	ins	ACG	ACCG	ACCG:10 ACG:0
NC_009900.1	1235461	del	CCAC	CC	CC:11 CCAC:1
NC_009900.1	1241207	snp	A	G	G:22 A:0
NC_009900.1	1248813	snp	A	C	C:21 A:0
NC_009900.1	1267036	snp	T	C	C:13 T:0
NC_009900.1	1274773	snp	T	G	G:18 T:0
NC_009900.1	1284552	snp	A	G	G:15 A:0
NC_009900.1	1305258	snp	G	T	T:11 G:0
NC_009900.1	1319925	snp	C	T	T:10 C:0
NC_009900.1	1320112	snp	C	T	T:16 C:0
NC_009900.1	1321479	snp	G	A	A:10 G:0
NC_009900.1	1325705	snp	C	A	A:10 C:0
NC_009897.1	1276	snp	T	C	C:21 T:0
NC_009897.1	6512	snp	A	G	G:53 A:0
NC_009897.1	6523	snp	A	G	G:55 A:0
NC_009897.1	11323	snp	G	A	A:40 G:0
NC_009897.1	11959	del	GTT	GT	GT:152 GTT:5
NC_009897.1	12587	snp	C	A	A:32 C:0
NC_009897.1	12802	snp	A	G	G:93 A:0

## Sheet: snps_CRt_Nablus
CHROM	POS	TYPE	REF	ALT	EVIDENCE
NZ_CP011126.1	8635	snp	C	A	A:31 C:0
NZ_CP011126.1	12728	snp	C	T	T:55 C:0
NZ_CP011126.1	12748	snp	C	G	G:53 C:0
NZ_CP011126.1	16212	snp	C	A	A:60 C:0
NZ_CP011126.1	21496	del	TCCCCCG	TCCCCG	TCCCCG:18 TCCCCCG:0
NZ_CP011126.1	42938	snp	G	A	A:45 G:0
NZ_CP011126.1	50142	snp	C	G	G:37 C:0
NZ_CP011126.1	50365	snp	C	T	T:54 C:0
NZ_CP011126.1	50563	snp	G	A	A:41 G:0
NZ_CP011126.1	52142	snp	C	T	T:58 C:0
NZ_CP011126.1	54428	snp	C	T	T:12 C:0
NZ_CP011126.1	56878	ins	CGC	CGGC	CGGC:25 CGC:0
NZ_CP011126.1	65158	snp	G	T	T:24 G:0
NZ_CP011126.1	70231	snp	C	G	G:10 C:0
NZ_CP011126.1	81407	snp	A	G	G:44 A:0
NZ_CP011126.1	91515	del	GCTCTCTCTCTCTA	GCTCTCTCTCTA	GCTCTCTCTCTA:30 GCTCTCTCTCTCTA:0
NZ_CP011126.1	102520	snp	C	A	A:17 C:0
NZ_CP011126.1	105328	snp	A	G	G:23 A:0
NZ_CP011126.1	105476	del	ATTTTTTTG	ATTTTTTG	ATTTTTTG:50 ATTTTTTTG:0
NZ_CP011126.1	109615	snp	C	T	T:34 C:0
NZ_CP011126.1	115142	snp	C	G	G:58 C:0
NZ_CP011126.1	115604	snp	A	T	T:53 A:0
NZ_CP011126.1	118730	snp	G	A	A:34 G:0
NZ_CP011126.1	131540	snp	G	A	A:22 G:0
NZ_CP011126.1	137645	ins	AGGGGGGGGGA	AGGGGGGGGGGA	AGGGGGGGGGGA:20 AGGGGGGGGGA:0
NZ_CP011126.1	139349	snp	A	G	G:31 A:0
NZ_CP011126.1	144277	snp	A	G	G:33 A:0
NZ_CP011126.1	147749	snp	G	A	A:23 G:0
NZ_CP011126.1	153523	snp	G	A	A:70 G:0
NZ_CP011126.1	188722	snp	C	A	A:57 C:0
NZ_CP011126.1	219989	snp	C	T	T:26 C:1
NZ_CP011126.1	224485	snp	T	C	C:55 T:0
NZ_CP011126.1	235940	snp	G	A	A:45 G:0
NZ_CP011126.1	248861	snp	G	T	T:24 G:0
NZ_CP011126.1	249039	del	TAAAAAAAAAT	TAAAAAAAAT	TAAAAAAAAT:26 TAAAAAAAAAT:0
NZ_CP011126.1	251147	snp	G	A	A:48 G:0
NZ_CP011126.1	253496	snp	C	T	T:61 C:0
NZ_CP011126.1	257209	del	AGGGGGGGGGT	AGGGGGGGT	AGGGGGGGT:20 AGGGGGGGGGT:0
NZ_CP011126.1	257587	snp	C	T	T:59 C:0
NZ_CP011126.1	258572	snp	G	A	A:38 G:0
NZ_CP011126.1	258621	ins	GCC	GCCC	GCCC:35 GCC:0
NZ_CP011126.1	259468	ins	TAAAAAAAAC	TAAAAAAAAAC	TAAAAAAAAAC:19 TAAAAAAAAC:1
NZ_CP011126.1	262375	snp	G	C	C:31 G:0
NZ_CP011126.1	266996	snp	G	A	A:50 G:0
NZ_CP011126.1	268399	del	ACCCCCCCCCA	ACCCCCCA	ACCCCCCA:27 ACCCCCCCCCA:0
NZ_CP011126.1	268970	snp	C	T	T:30 C:0
NZ_CP011126.1	269112	snp	C	T	T:40 C:0
NZ_CP011126.1	272501	ins	CGGGGGGA	CGGGGGGGA	CGGGGGGGA:20 CGGGGGGA:0
NZ_CP011126.1	279684	snp	G	A	A:16 G:0
NZ_CP011126.1	286463	snp	C	T	T:28 C:0
NZ_CP011126.1	301897	snp	G	C	C:16 G:0
NZ_CP011126.1	304164	snp	C	T	T:32 C:0
NZ_CP011126.1	305579	snp	C	T	T:45 C:0
NZ_CP011126.1	313200	del	ATTTTTTTTA	ATTTTTTTA	ATTTTTTTA:14 ATTTTTTTTA:0
NZ_CP011126.1	318172	ins	GTTTTTTTTA	GTTTTTTTTTA	GTTTTTTTTTA:12 GTTTTTTTTA:0
NZ_CP011126.1	318195	snp	C	T	T:17 C:0
NZ_CP011126.1	318259	ins	GTTTTTTTA	GTTTTTTTTA	GTTTTTTTTA:18 GTTTTTTTA:0
NZ_CP011126.1	324127	snp	A	T	T:33 A:0
NZ_CP011126.1	333624	snp	T	C	C:29 T:0
NZ_CP011126.1	340974	ins	TAA	TAAA	TAAA:40 TAA:3
NZ_CP011126.1	356125	snp	G	A	A:42 G:0
NZ_CP011126.1	364987	snp	C	T	T:40 C:0
NZ_CP011126.1	370617	snp	G	C	C:52 G:0
NZ_CP011126.1	380535	del	ATGT	AT	AT:51 ATGT:0
NZ_CP011126.1	390028	snp	G	A	A:23 G:0
NZ_CP011126.1	401819	snp	G	T	T:41 G:0
NZ_CP011126.1	408937	snp	C	A	A:18 C:0
NZ_CP011126.1	413182	snp	G	A	A:50 G:0
NZ_CP011126.1	414690	snp	T	C	C:25 T:0
NZ_CP011126.1	419108	ins	TCT	TCCT	TCCT:22 TCT:0
NZ_CP011126.1	429411	snp	C	A	A:61 C:0
NZ_CP011126.1	433509	snp	C	T	T:16 C:0
NZ_CP011126.1	433941	snp	A	G	G:39 A:0
NZ_CP011126.1	443191	snp	C	T	T:30 C:0
NZ_CP011126.1	742203	snp	A	G	G:11 A:0
NZ_CP011126.1	743065	snp	C	T	T:36 C:0
NZ_CP011126.1	757191	snp	G	A	A:34 G:0
NZ_CP011126.1	766450	del	TAAAAAAAAT	TAAAAAAAT	TAAAAAAAT:37 TAAAAAAAAT:0
NZ_CP011126.1	768990	snp	G	A	A:10 G:0
NZ_CP011126.1	769036	snp	T	A	A:16 T:0
NZ_CP011126.1	773152	snp	C	T	T:24 C:0
NZ_CP011126.1	773553	snp	C	T	T:47 C:0
NZ_CP011126.1	793129	snp	A	G	G:26 A:0
NZ_CP011126.1	794908	snp	C	T	T:33 C:0
NZ_CP011126.1	794938	snp	A	G	G:35 A:0
NZ_CP011126.1	802539	snp	C	T	T:34 C:0
NZ_CP011126.1	818075	snp	G	A	A:43 G:0
NZ_CP011126.1	837356	snp	G	T	T:29 G:0
NZ_CP011126.1	837917	snp	C	T	T:23 C:0
NZ_CP011126.1	844948	snp	C	T	T:13 C:0
NZ_CP011126.1	847070	del	TAGTTTAAGTTAAAATGTAA	TA	TA:16 TAGTTTAAGTTAAAATGTAA:1
NZ_CP011126.1	865449	ins	CCACTTG	CCACTTCACTTG	CCACTTCACTTG:24 CCACTTG:0
NZ_CP011126.1	877659	snp	G	A	A:40 G:0
NZ_CP011126.1	879993	snp	A	G	G:23 A:0
NZ_CP011126.1	883156	snp	C	T	T:38 C:0
NZ_CP011126.1	893112	snp	G	A	A:28 G:0
NZ_CP011126.1	898873	ins	TCCCCCCCG	TCCCCCCCCG	TCCCCCCCCG:20 TCCCCCCCG:0
NZ_CP011126.1	904038	del	CCGA	CA	CA:41 CCGA:0
NZ_CP011126.1	904689	snp	T	C	C:39 T:0
NZ_CP011126.1	906382	snp	C	T	T:37 C:0
NZ_CP011126.1	912973	snp	C	T	T:51 C:0
NZ_CP011126.1	918473	ins	GAAAAAAAAT	GAAAAAAAAAT	GAAAAAAAAAT:22 GAAAAAAAAT:0
NZ_CP011126.1	918590	snp	C	T	T:29 C:0
NZ_CP011126.1	920773	snp	A	C	C:28 A:0
NZ_CP011126.1	923277	snp	G	T	T:22 G:0
NZ_CP011126.1	929090	ins	AGGGGGGGGA	AGGGGGGGGGA	AGGGGGGGGGA:15 AGGGGGGGGA:0
NZ_CP011126.1	930456	del	GTTTTTTTG	GTTTTTTG	GTTTTTTG:23 GTTTTTTTG:0
NZ_CP011126.1	930726	snp	G	T	T:41 G:0
NZ_CP011126.1	931099	snp	C	T	T:42 C:0
NZ_CP011126.1	934006	complex	AGGGGGGC	AGGGGGGGT	AGGGGGGGT:13 AGGGGGGC:0
NZ_CP011126.1	943624	snp	A	G	G:65 A:0
NZ_CP011126.1	952526	snp	A	G	G:30 A:0
NZ_CP011126.1	952832	snp	C	T	T:25 C:0
NZ_CP011126.1	954748	snp	G	A	A:27 G:0
NZ_CP011126.1	955500	snp	C	T	T:35 C:0
NZ_CP011126.1	960826	snp	G	A	A:37 G:0
NZ_CP011126.1	961326	snp	T	C	C:20 T:0
NZ_CP011126.1	962804	snp	C	T	T:27 C:0
NZ_CP011126.1	964138	snp	C	A	A:12 C:0
NZ_CP011126.1	964979	snp	C	T	T:52 C:0
NZ_CP011126.1	965481	del	ATCTCTGATTAATTTTTT	AT	AT:17 ATCTCTGATTAATTTTTT:0
NZ_CP011126.1	972230	snp	C	T	T:27 C:0
NZ_CP011126.1	972467	snp	A	G	G:58 A:0
NZ_CP011126.1	974328	ins	AACC	AACACC	AACACC:30 AACC:0
NZ_CP011126.1	977720	snp	G	A	A:33 G:0
NZ_CP011126.1	989791	snp	C	A	A:35 C:0
NZ_CP011126.1	991288	snp	G	A	A:13 G:0
NZ_CP011126.1	991873	snp	C	A	A:10 C:0
NZ_CP011126.1	993694	snp	C	A	A:41 C:0
NZ_CP011126.1	999030	snp	C	T	T:35 C:0
NZ_CP011126.1	1000363	snp	T	C	C:26 T:0
NZ_CP011126.1	1002828	snp	C	T	T:55 C:0
NZ_CP011126.1	1004013	snp	G	T	T:46 G:0
NZ_CP011126.1	1004663	snp	G	C	C:41 G:0
NZ_CP011126.1	1004673	snp	C	G	G:42 C:0
NZ_CP011126.1	1007584	snp	G	A	A:30 G:0
NZ_CP011126.1	1009418	snp	C	A	A:60 C:0
NZ_CP011126.1	1009778	snp	G	A	A:26 G:0
NZ_CP011126.1	1011350	snp	G	T	T:38 G:0
NZ_CP011126.1	1012480	snp	A	T	T:47 A:0
NZ_CP011126.1	1021149	ins	CAAAAAAAG	CAAAAAAAAG	CAAAAAAAAG:31 CAAAAAAAG:0
NZ_CP011126.1	1031713	snp	C	T	T:58 C:0
NZ_CP011126.1	1033012	del	ATTTTTTTTTG	ATTTTTTTTG	ATTTTTTTTG:10 ATTTTTTTTTG:0
NZ_CP011126.1	1033910	snp	C	T	T:34 C:0
NZ_CP011126.1	1034710	snp	C	T	T:15 C:0
NZ_CP011126.1	1036687	del	ACC	AC	AC:33 ACC:0
NZ_CP011126.1	1038305	snp	G	A	A:34 G:0
NZ_CP011126.1	1038637	snp	G	T	T:24 G:0
NZ_CP011126.1	1041226	ins	AGGGGGGGGA	AGGGGGGGGGA	AGGGGGGGGGA:15 AGGGGGGGGA:0
NZ_CP011126.1	1043759	snp	C	T	T:38 C:0
NZ_CP011126.1	1049369	snp	A	G	G:37 A:0
NZ_CP011126.1	1053874	snp	G	A	A:28 G:0
NZ_CP011126.1	1058352	snp	G	A	A:20 G:0
NZ_CP011126.1	1061012	snp	G	A	A:32 G:0
NZ_CP011126.1	1075908	snp	G	A	A:14 G:0
NZ_CP011126.1	1076093	snp	C	A	A:19 C:0
NZ_CP011126.1	1076168	del	ATTTTTTTTTTG	ATTTTTTTTTG	ATTTTTTTTTG:20 ATTTTTTTTTTG:0
NZ_CP011126.1	1077209	snp	G	T	T:15 G:0
NZ_CP011126.1	1083644	mnp	GC	TT	TT:15 GC:0
NZ_CP011126.1	1083956	snp	C	T	T:46 C:0
NZ_CP011126.1	1093818	snp	G	A	A:33 G:0
NZ_CP011126.1	1098345	snp	C	T	T:44 C:0
NZ_CP011126.1	1099927	snp	A	C	C:63 A:0
NZ_CP011126.1	1101233	snp	T	G	G:57 T:0
NZ_CP011126.1	1110770	snp	C	G	G:28 C:0
NZ_CP011126.1	1117385	snp	G	A	A:23 G:0
NZ_CP011126.1	1119952	snp	C	A	A:41 C:0
NZ_CP011126.1	1135986	snp	G	A	A:34 G:0
NZ_CP011126.1	1137580	snp	C	A	A:48 C:0
NZ_CP011126.1	1138912	snp	C	A	A:36 C:0
NZ_CP011126.1	1153663	snp	G	C	C:42 G:0
NZ_CP011126.1	1156689	snp	G	T	T:40 G:0
NZ_CP011126.1	1172536	snp	G	A	A:51 G:0
NZ_CP011126.1	1175077	snp	G	A	A:19 G:0
NZ_CP011126.1	1184872	snp	T	C	C:25 T:0
NZ_CP011126.1	1191717	snp	C	A	A:59 C:0
NZ_CP011126.1	1192239	snp	C	A	A:38 C:0
NZ_CP011126.1	1192908	ins	GTTTTTTTTC	GTTTTTTTTTC	GTTTTTTTTTC:20 GTTTTTTTTC:0
NZ_CP011126.1	1198806	snp	C	A	A:47 C:0
NZ_CP011126.1	1201839	snp	G	C	C:41 G:0
NZ_CP011126.1	1204866	snp	G	A	A:33 G:0
NZ_CP011126.1	1205415	snp	C	T	T:44 C:0
NZ_CP011126.1	1208159	snp	C	A	A:13 C:0
NZ_CP011126.1	1208755	snp	C	G	G:47 C:0
NZ_CP011126.1	1214071	snp	G	A	A:17 G:0
NZ_CP011126.1	1222390	snp	C	T	T:38 C:0
NZ_CP011126.1	1228518	snp	C	T	T:26 C:0
NZ_CP011126.1	1231557	snp	G	A	A:43 G:0
NZ_CP011126.1	1232078	snp	C	A	A:44 C:0
NZ_CP011126.1	1237689	snp	G	C	C:30 G:0
NZ_CP011126.1	1250978	snp	G	T	T:37 G:0
NZ_CP011126.1	1257817	snp	G	A	A:29 G:0
NZ_CP011126.1	1259207	snp	G	A	A:53 G:0
NZ_CP011126.1	1268483	snp	C	T	T:39 C:0
NZ_CP011126.1	1269150	del	TAAAAAAAAAT	TAAAAAAAAT	TAAAAAAAAT:14 TAAAAAAAAAT:0
NZ_CP011126.1	1273409	snp	G	A	A:37 G:0
NZ_CP011126.1	1304226	ins	TACCC	TACCACCC	TACCACCC:23 TACCC:0
NZ_CP011126.1	1305381	snp	C	T	T:17 C:0
NZ_CP011126.1	1307408	snp	C	A	A:11 C:0
NZ_CP011126.1	1308302	snp	C	A	A:39 C:0
NZ_CP011126.1	1308310	snp	G	C	C:35 G:0
NZ_CP011126.1	1309327	snp	C	T	T:39 C:0
NZ_CP011126.1	1309540	snp	G	T	T:14 G:0
NZ_CP011126.1	1310291	ins	CAAAAAAAAAG	CAAAAAAAAAAG	CAAAAAAAAAAG:18 CAAAAAAAAAG:0
NZ_CP011126.1	1311317	snp	G	T	T:17 G:0
NZ_CP011126.1	1311599	del	TAAAAAAAG	TAAAAAAG	TAAAAAAG:11 TAAAAAAAG:0
NZ_CP011126.1	1314415	snp	G	T	T:27 G:0
NZ_CP011126.1	1314526	snp	C	A	A:31 C:0
NZ_CP011126.1	1316331	snp	G	T	T:10 G:0
NZ_CP011126.1	1317370	snp	C	T	T:29 C:1
NZ_CP011126.1	1326597	ins	TCCCCCCCT	TCCCCCCCCCT	TCCCCCCCCCT:12 TCCCCCCCT:0
NZ_CP011126.1	1331014	snp	G	C	C:56 G:0
NZ_CP011126.1	1334829	snp	C	G	G:27 C:0
NZ_CP011126.1	1337753	snp	A	C	C:25 A:0
NZ_CP011126.1	1337906	snp	G	A	A:40 G:0
NZ_CP011126.1	1343429	snp	G	A	A:45 G:0
NZ_CP011126.1	1345412	snp	G	A	A:18 G:0
NZ_CP011126.1	1347301	snp	T	C	C:32 T:0
NZ_CP011126.1	1350898	snp	C	A	A:38 C:0
NZ_CP011126.1	1365541	snp	A	C	C:26 A:0
NZ_CP011126.1	1367105	snp	C	T	T:36 C:0
NZ_CP011126.1	1367468	del	ACCCCCCCCA	ACCCCCCA	ACCCCCCA:20 ACCCCCCCCA:0
NZ_CP011126.1	1368601	ins	TCCCCCCCG	TCCCCCCCCG	TCCCCCCCCG:25 TCCCCCCCG:0
NZ_CP011126.1	1370841	snp	A	G	G:31 A:0
NZ_CP011126.1	1376310	snp	C	T	T:64 C:0
NZ_CP011126.1	1376405	snp	G	A	A:51 G:0
NZ_CP011126.1	1384541	snp	C	T	T:42 C:0
NZ_CP011126.1	1385088	snp	A	G	G:34 A:0
NZ_CP011126.1	1387015	del	GTTTTTTTTTA	GTTTTTTTTA	GTTTTTTTTA:20 GTTTTTTTTTA:0
NZ_CP011126.1	1388963	snp	T	A	A:39 T:0
NZ_CP011126.1	1390682	snp	C	T	T:33 C:0
NZ_CP011126.1	1393602	snp	A	T	T:26 A:0
NZ_CP011126.1	1400067	snp	C	T	T:19 C:0
NZ_CP011126.1	1404568	snp	G	T	T:40 G:0
NZ_CP011126.1	1428552	snp	T	C	C:14 T:0
NZ_CP011126.1	1439246	snp	C	T	T:21 C:0
NZ_CP011126.1	1439501	ins	ACT	ACCT	ACCT:29 ACT:0
NZ_CP011126.1	1452482	snp	T	C	C:41 T:0
NZ_CP011126.1	1465850	snp	G	A	A:46 G:0
NZ_CP011126.1	1482474	del	CTAACGCATAACGCATAACGCATAACGCATAACGCATAACGCATAACGCAT	CTAACGCATAACGCATAACGCATAACGCATAACGCATAACGCAT	CTAACGCATAACGCATAACGCATAACGCATAACGCATAACGCAT:22 CTAACGCATAACGCATAACGCATAACGCATAACGCATAACGCATAACGCAT:0
NZ_CP011126.1	1483808	snp	G	T	T:49 G:0
NZ_CP011126.1	1486996	snp	C	A	A:14 C:0
NZ_CP011126.1	1490354	del	AAACATAAAATGCGCTTCATTT	AT	AT:15 AAACATAAAATGCGCTTCATTT:0
NZ_CP011126.1	1491729	snp	C	A	A:16 C:0
NZ_CP011126.1	1498802	snp	T	A	A:29 T:0
NZ_CP011126.1	1504889	snp	G	A	A:32 G:0
NZ_CP011126.1	1507094	ins	CTCATCTAACATTCATCTAACATTCATCTAACATT	CTCATCTAACATTCATCTAACATTCATCTAACATTCATCTAACATT	CTCATCTAACATTCATCTAACATTCATCTAACATTCATCTAACATT:21 CTCATCTAACATTCATCTAACATTCATCTAACATT:0
NZ_CP011126.1	1514204	snp	T	C	C:26 T:0
NZ_CP011126.1	1516573	ins	TGCCGCCC	TGCCGCCGCCC	TGCCGCCGCCC:27 TGCCGCCC:0
NZ_CP011126.1	1524983	del	TAATGCTGTCTAAATGCTGTCTAAATGCTGTCTAT	TAATGCTGTCTAAATGCTGTCTAT	TAATGCTGTCTAAATGCTGTCTAT:20 TAATGCTGTCTAAATGCTGTCTAAATGCTGTCTAT:0
NZ_CP011126.1	1535831	snp	G	A	A:26 G:0
NZ_CP011126.1	1538434	snp	G	A	A:16 G:0
NZ_CP011126.1	1538930	snp	C	A	A:97 C:0
NZ_CP011126.1	1540209	snp	C	A	A:35 C:0
NZ_CP011126.1	1546154	snp	G	A	A:31 G:0
NZ_CP011126.1	1548582	snp	C	T	T:36 C:1
NZ_CP011126.1	1548590	snp	C	T	T:28 C:0
NZ_CP011126.1	1550501	snp	C	A	A:27 C:0
NZ_CP011126.1	1554761	snp	C	T	T:39 C:0
NZ_CP011126.1	1555447	snp	C	A	A:10 C:0
NZ_CP011126.1	1557917	snp	G	A	A:23 G:0
NZ_CP011126.1	1565297	snp	G	A	A:27 G:0
NZ_CP011126.1	1566683	snp	G	A	A:36 G:0
NZ_CP011126.1	1572276	snp	C	T	T:68 C:0
NZ_CP011126.1	1579902	snp	G	C	C:24 G:0
NZ_CP011126.1	1593332	snp	T	C	C:9 T:1
NZ_CP011126.1	1593518	snp	C	T	T:27 C:0
NZ_CP011126.1	1593794	ins	ACCCCCCCA	ACCCCCCCCA	ACCCCCCCCA:13 ACCCCCCCA:0
NZ_CP011126.1	1596540	snp	G	C	C:20 G:0
NZ_CP011126.1	1599776	snp	A	G	G:37 A:0
NZ_CP011126.1	1605069	snp	G	A	A:32 G:0
NZ_CP011126.1	1612023	snp	C	T	T:54 C:0
NZ_CP011126.1	1618206	snp	A	G	G:25 A:0
NZ_CP011126.1	1623733	snp	C	T	T:23 C:0
NZ_CP011126.1	1626757	snp	G	A	A:36 G:0
NZ_CP011126.1	1627883	ins	ATTTTTTTTTG	ATTTTTTTTTTTTTTG	ATTTTTTTTTTTTTTG:10 ATTTTTTTTTG:0
NZ_CP011126.1	1639879	snp	C	T	T:43 C:0
NZ_CP011126.1	1640280	snp	G	T	T:39 G:0
NZ_CP011126.1	1644894	snp	C	T	T:38 C:0
NZ_CP011126.1	1647404	snp	A	G	G:31 A:0
NZ_CP011126.1	1647422	ins	TCCCCCCCA	TCCCCCCCCA	TCCCCCCCCA:19 TCCCCCCCA:0
NZ_CP011126.1	1659442	mnp	AA	GG	GG:36 AA:0
NZ_CP011126.1	1683453	snp	G	A	A:28 G:0
NZ_CP011126.1	1694044	snp	C	T	T:34 C:0
NZ_CP011126.1	1706338	del	CTTTTTTC	CTTTTTC	CTTTTTC:33 CTTTTTTC:0
NZ_CP011126.1	1706916	snp	C	T	T:58 C:0
NZ_CP011126.1	1714952	del	CAAAAAAAAAC	CAAAAAAAAC	CAAAAAAAAC:25 CAAAAAAAAAC:0
NZ_CP011126.1	1715309	snp	C	G	G:1064 C:47
NZ_CP011126.1	1715381	snp	A	G	G:881 A:52
NZ_CP011126.1	1716486	snp	C	T	T:36 C:0
NZ_CP011126.1	1725137	ins	CGA	CGGA	CGGA:42 CGA:0
NZ_CP011126.1	1725258	snp	G	A	A:55 G:0
NZ_CP011126.1	1733598	del	GCCCCCCCCT	GCCCCCCCT	GCCCCCCCT:12 GCCCCCCCCT:0
